# Supplementary material for: SNAP-25 is a promising novel cerebrospinal fluid biomarker for synapse degeneration in Alzheimer’s disease
Source: PubMed Central journal article supplement (PMC4253625; doi:10.1186/1750-1326-9-53), 2014-11-23
Supplement: 13024_2014_561_MOESM1_ESM.pdf [file 13024_2014_561_MOESM1_ESM.pdf]

***SUPPLEMENTARY INFORMATION***

***Supplementary Tables 1-3 and Figures 1-2***

SNAP-25 is a promising novel cerebrospinal fluid biomarker for synapse degeneration in Alzheimer's disease.

Ann Brinkmalm<sup>1</sup>, Gunnar Brinkmalm<sup>1</sup>, William G. Honer<sup>2</sup>, Lutz Frölich<sup>3</sup>, Lucrezia Hausner<sup>3</sup>, Lennart Minthon<sup>4,5</sup>, Oskar Hansson<sup>4,5</sup>, Anders Wallin<sup>1</sup>, Henrik Zetterberg<sup>1,6</sup>, Kaj Blennow<sup>1\*</sup>, and Annika Öhrfelt<sup>1</sup>

*<sup>1</sup>Institute of Neuroscience and Physiology, Department of Psychiatry and Neurochemistry, Sahlgrenska Academy at the University of Gothenburg, S-431 80 Mölndal, Sweden*

*<sup>2</sup>Department of Psychiatry, University of British Columbia, Vancouver, Canada*

*<sup>3</sup>Department of Geriatric Psychiatry, Central Institute for Mental Health Mannheim, University of Heidelberg, Mannheim, Germany*

*<sup>4</sup>Clinical Memory Research Unit, Department of Clinical Sciences, Lund University, Sweden*

*<sup>5</sup>Memory Clinic, Skåne University Hospital, Sweden*

*<sup>6</sup>UCL Institute of Neurology, Queen Square, London WC1N 3BG, United Kingdom*

**Supplementary Table 1 Clinical and demographic characteristics of the brain tissue material.**

| Diagnosis           | Numbers (Female/Male) | Age at death [years] <sup>a</sup> | Post-mortem delay [min] <sup>a</sup> |
|---------------------|-----------------------|-----------------------------------|--------------------------------------|
| Controls            | 15 (7/8)              | 73 (70-77)                        | 340 (330-383)<br>p<0.05)             |
| Alzheimer's disease | 15 (6/9)              | 73 (71-76)                        | 300 (268-330)                        |

<sup>a</sup>Data are given as median (inter-quartile range) There is no correlation between post-mortem delay and levels of SNAP-25, 18-30.

**Supplementary Table 2 Soluble SNAP-25 forms identified by LC-MS/MS.**

| SNAP-25 form | Theoretical mass [Da] <sup>a</sup> | Mass deviation [ppm] | Fragments detected (b/y) |
|--------------|------------------------------------|----------------------|--------------------------|
| Ac-2-20      | 2348.0132                          | 0                    | 12/13                    |
| Ac-2-21      | 2461.0961                          | 2                    | 11/10                    |
| Ac-2-22      | 2532.1332                          | 3                    | 9/10                     |
| Ac-2-30      | 3449.5423                          | 3                    | 6/10                     |
| Ac-2-32      | 3736.6838                          | 1                    | 11/9                     |
| Ac-2-33      | 3849.7679                          | 2                    | 15/16                    |
| Ac-2-46      | 5276.5095                          | 2                    | 13/7                     |
| Ac-2-47      | 5389.5936                          | 1                    | 14/7                     |

<sup>a</sup>monoisotopic mass values

**Supplementary Table 3 HR-SIM-MS peak areas<sup>a</sup> of the human CSF tryptic SNAP-25 peptide Ac-2-16, and the spiked in isotopically labeled peptides Ac-2-16[R] and Ac-2-16[L].**

| Aliquot/peptide | Ac-2-16 |      | Ac-2-16[L] |      | Ac-2-16[R] |     |
|-----------------|---------|------|------------|------|------------|-----|
|                 | 3+      | 2+   | 3+         | 2+   | 3+         | 2+  |
| #1              | 1.9     | 0.67 | 50         | 22   | 52         | 19  |
| #2              | 1.1     | 0.42 | 36         | 17   | 42         | 15  |
| #3              | 1.3     | 0.49 | 43         | 19   | 45         | 17  |
| #4              | 1.6     | 0.55 | 44         | 20   | 49         | 18  |
| #5              | 1.3     | 0.41 | 41         | 18   | 44         | 15  |
| #6              | 1.4     | 0.46 | 43         | 18   | 48         | 17  |
| #7              | 1.2     | 0.43 | 40         | 17   | 43         | 15  |
| #8              | 1.5     | 0.51 | 43         | 19   | 44         | 16  |
| Average         | 1.4     | 0.49 | 43         | 19   | 46         | 17  |
| StDev           | 0.25    | 0.09 | 3.9        | 1.9  | 3.4        | 1.5 |
| CV[%]           | 18      | 18   | 9.1        | 10.1 | 7.3        | 9.0 |

<sup>a</sup>presented value is the Pinpoint peak area divided by 10<sup>5</sup>

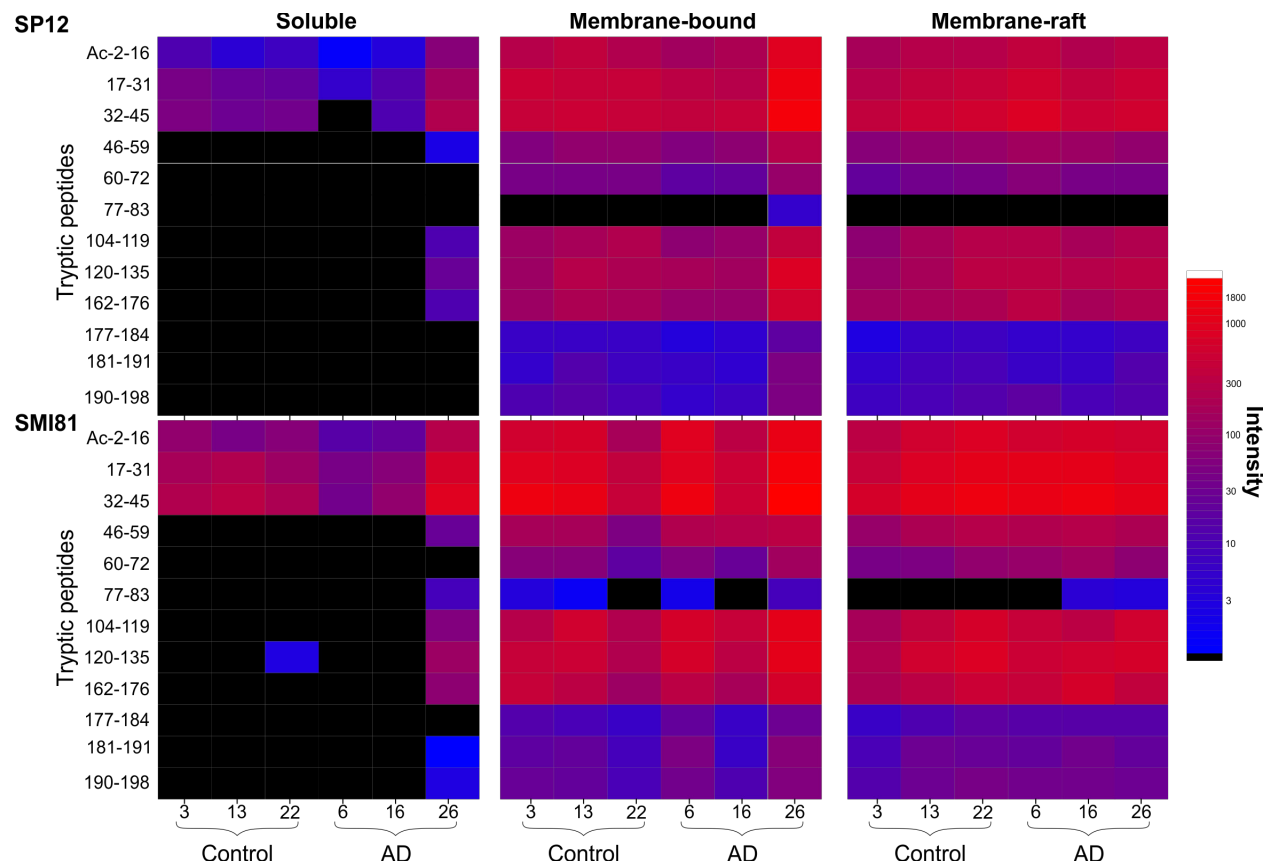

**Supplementary Figure 1 Heat map for the relative signal intensities of individual tryptic peptides from SNAP-25B.** Biochemically fractionated soluble (left panels), membrane-bound (middle panels) and membrane-raft associated (right panels) proteins of superior parietal gyrus from controls (N=3) and patients with AD (N=3) were immunoprecipitated with SP12 (upper panels) and SMI81 (lower panels) respectively. LC-MS/MS ion chromatograms of all peptides identified as belonging to SNAP-25B were extracted. An increase of signal intensity is seen as a white shift.

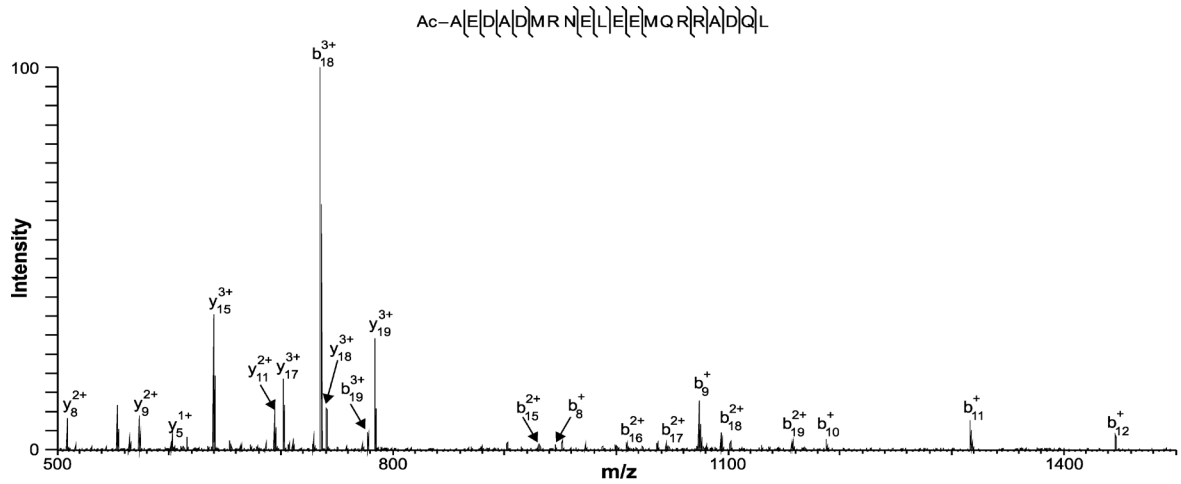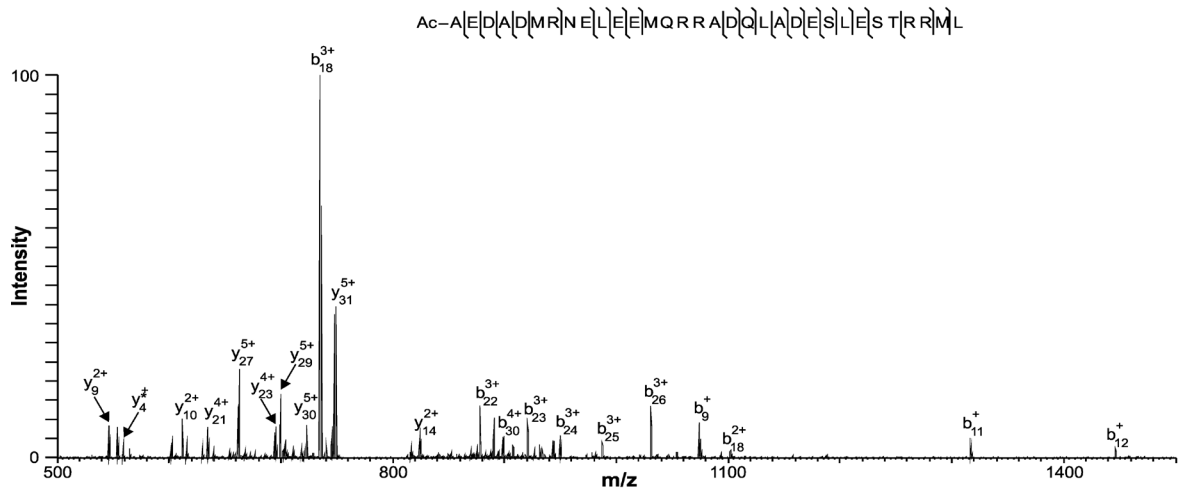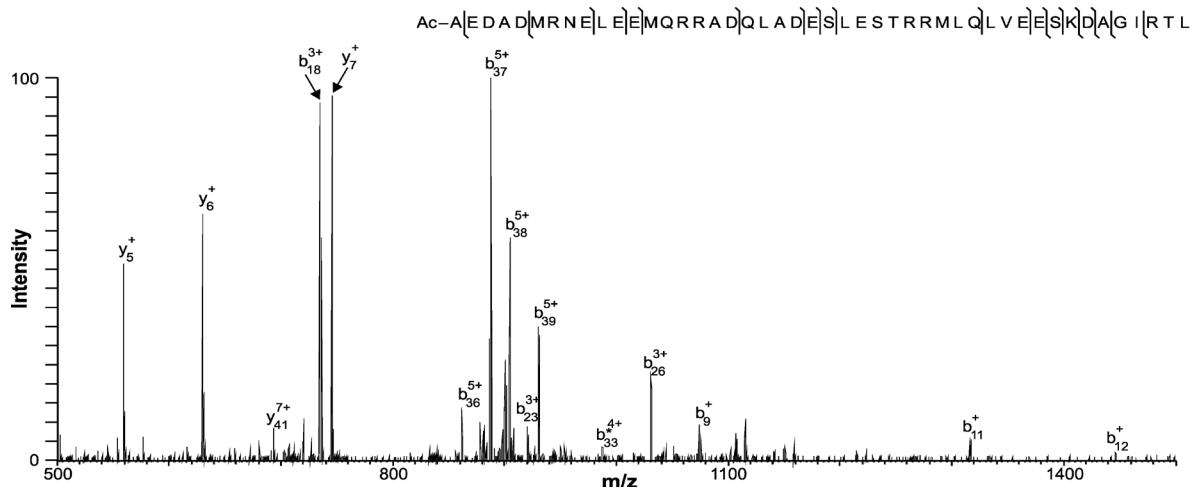

**Supplementary Figure 2 Tandem mass spectra of three different soluble N-terminal fragments of SNAP-25 acquired in the FTICR mode. Fragments confirmed by database search are indicated in the respective sequences.**
